# Supplementary material
Source: HighWire-hosted journal article supplement (https://ijgc.bmj.com/highwire/filestream/23423/field_highwire_adjunct_files/5/ijgc-2021-003132supp006_data_supplement.pdf)
Supplement: ijgc-2021-003132supp006_data_supplement.pdf [file ijgc-2021-003132supp006_data_supplement.pdf]

**Supplemental Table 3.** The incidence of endometrial hyperplasia in female Lynch syndrome carriers detected through screening, or through symptoms during interval visits or regular review.

| Authors                                | Sample Size (Screening Visits)                               | Number of Hyperplasias Detected on Final Histo-Pathology (% of Sample Size)                                                                                | Number of Hyperplasias Detected by Screening (% of Confirmed Hyperplasia) | Number of Interval and Symptomatic Hyperplasia |
|----------------------------------------|--------------------------------------------------------------|------------------------------------------------------------------------------------------------------------------------------------------------------------|---------------------------------------------------------------------------|------------------------------------------------|
| Dove- Edwin et al <sup>10</sup>        | 269 (522)                                                    | Not provided                                                                                                                                               |                                                                           |                                                |
| Rijcken et al <sup>11</sup>            | 41 (179)                                                     | 3 (7%) CAH                                                                                                                                                 | 3 (7%) CAH                                                                |                                                |
| Renkonen- Sinisalo et al <sup>12</sup> | 175 (503)                                                    | 9 (5.1%) EH: 4 CAH, 1 SAH, 3 CH, 1 SH                                                                                                                      | 9 (100%) EH via EB<br>5 (55.6%) EH via TVUS                               |                                                |
| Lecuru et al <sup>13</sup>             | 62                                                           | 3 (4.8%) EH, all simple hyperplasia                                                                                                                        | 1 (33.3%) EH as 2 were symptomatic                                        |                                                |
| Gerritzen et al <sup>14</sup>          | 100 (285)                                                    | Period I: 1 (1%) SAH at 48yo, in MLH1.<br>Period II: 3 (3%) CAH at 45-56yo, in MMR carriers.                                                               | Period I: 1 (100%) SAH<br>Period II: 3 (100%) CAH                         |                                                |
| Jarvinen et al <sup>15</sup>           | 103 MMR carriers                                             | 7 (6.8%) EH                                                                                                                                                | Unclear                                                                   |                                                |
| Lecuru et al <sup>16</sup>             | 58 (96)                                                      | Not provided                                                                                                                                               |                                                                           |                                                |
| Guillen-Ponce et al <sup>17</sup>      | 91                                                           |                                                                                                                                                            |                                                                           |                                                |
| Bats et al <sup>18</sup>               | 111                                                          | 0 (0%) EH                                                                                                                                                  |                                                                           |                                                |
| Manchanda et al <sup>19</sup>          | 41 (69)                                                      | 3 (7.3%) EH, 1 of which was atypical                                                                                                                       | 2 (67%) EH                                                                |                                                |
| Stuckless et al <sup>20</sup>          | 54                                                           |                                                                                                                                                            |                                                                           |                                                |
| Helder- Woolderink et al <sup>21</sup> | Total: 75 (266)<br>Period I: 44 (117)<br>Period II: 63 (149) | Period I: 2 (4.5%) EH at 39-48yo in MMR carriers, 1 other had no final histology results.<br>Period II: 0 (0%) EH, 1 other had no final histology results. | Period I: 0 (0%) EH as both were symptomatic. Period II: 0 (0%) EH        |                                                |

|                                   |            |                                                          |                                        |                                                                           |
|-----------------------------------|------------|----------------------------------------------------------|----------------------------------------|---------------------------------------------------------------------------|
| Douay- Hauser et al <sup>22</sup> | 157 (504)  | 0 (0%) EH                                                |                                        |                                                                           |
| Ketabi et al <sup>23</sup>        | 871 (1945) | 5 (0.57%) EH (4 CAH + 1 CH) at 46-52yo, in MMR carriers. | 0 (0%) CAH, as all had symptoms.       | 2 interval CAH                                                            |
| Tzortzatos et al <sup>24</sup>    | 45         | 2 (4.4%) CAH at 48-49yo, in MLH1 carriers.               | 2 (100%) CAH                           |                                                                           |
| Gosset et al <sup>25</sup>        | 191 (620)  |                                                          |                                        |                                                                           |
| Nebgen et al <sup>26</sup>        | 80 (215)   | 11 (13.8%) EH: 2 SH + 5 CH + 4 CAH                       | 11 (100%) detected in screening visits |                                                                           |
| Eikenboom et al <sup>27</sup>     | 164 (680)  | 8 (4.9%) EH                                              | 2 (25%) asymptomatic                   | 3 symptomatic<br>3 unknown if symptomatic or identified through screening |

CAH, complex atypical hyperplasia; CH, complex hyperplasia; SH, simple hyperplasia; SAH, simple atypical hyperplasia; EH, endometrial hyperplasia
